1 *Toxoplasma gondii* infection triggers chronic cachexia and sustained commensal  
2 dysbiosis in mice

3

4 Jessica A. Hatter<sup>1¶</sup>, Yue Moi Kouche<sup>2¶</sup>, Stephanie J. Melchor<sup>1¶</sup>, Katherine Ng<sup>3</sup>, Donna  
5 M. Bouley<sup>2</sup>, John C. Boothroyd<sup>3</sup>, Sarah E. Ewald<sup>1\*</sup>

6

7 <sup>1</sup>Department of Microbiology, Immunology and Cancer Biology and the Carter  
8 Immunology Center, University of Virginia School of Medicine Charlottesville VA.

9 <sup>2</sup>Department of Comparative Medicine, Stanford University, Stanford CA.

10 <sup>3</sup>Department of Microbiology and Immunology, Stanford University, Stanford CA.

11

12 \* Corresponding Author:

13 se2s@virginia.edu (SEE)

14

15 ¶Authors contributed equally.

## 16 Abstract

17 *Toxoplasma gondii* is a protozoan parasite with a predation-mediated transmission  
18 cycle between rodents and felines. Intermediate hosts acquire *Toxoplasma* by eating  
19 parasite cysts which invade the small intestine, disseminate systemically and finally  
20 establish host life-long chronic infection in brain and muscles. Here we show that  
21 *Toxoplasma* infection can trigger a severe form of sustained cachexia: a disease of  
22 progressive weight loss that is a causal predictor of mortality in cancer, chronic disease  
23 and many infections. *Toxoplasma* cachexia is characterized by acute anorexia,  
24 systemic inflammation and loss of 20% body mass. Although mice recover from  
25 symptoms of peak sickness they fail to regain muscle mass or visceral adipose depots.  
26 We asked whether the damage to the intestinal microenvironment observed at acute  
27 time points was sustained in chronic infection and could thereby play a role the  
28 sustaining cachexia. We found that parasites replicate in the same region of the distal  
29 jejunum/proximal ileum throughout acute infection, inducing the development of  
30 secondary lymphoid structures and severe, regional inflammation. Small intestine  
31 pathology was resolved by 5 weeks post-infection. However, changes in the commensal  
32 populations, notably an outgrowth of *Clostridia spp.*, were sustained in chronic infection.  
33 Importantly, uninfected animals co-housed with infected mice display similar changes in  
34 commensal microflora but never display symptoms of cachexia, indicating that altered  
35 commensals are not sufficient to explain the cachexia phenotype alone. These studies  
36 indicate that *Toxoplasma* infection is a novel and robust model to study the immune-  
37 metabolic interactions that contribute chronic cachexia development, pathology and  
38 potential reversal.

## 39 Introduction

40           Chronic diseases account for over 85% of deaths in the first world and 70% of  
41 deaths globally(1). The co-occurrence of cachexia, or the progressive loss of lean body  
42 mass, is one of the best predictors of mortality across chronic disease. Cachexia is  
43 distinct from starvation or malabsorption and can be accompanied by anorexia, elevated  
44 inflammatory cytokines (IL-1, IL-6 and TNF), loss of fat and insulin resistance(2). In  
45 human disease, therapeutic interventions including nutritional supplementation, appetite  
46 stimulants, steroid treatment and TNF inhibitors have not proven widely successful to  
47 block or reverse cachexia(3). Current animal models of cachexia are limited in that they  
48 are transient (endotoxin injection) or have a short window of study between weight loss  
49 onset and death (cardiac, gastric or renal obstruction surgeries and tumor)(4). There is  
50 a great need to develop experimental tools to study the biology of chronic cachexia and  
51 identify targets for disease intervention.

52           *Toxoplasma gondii* is an obligate intracellular protozoan parasite that cycles  
53 between a broad range of mammalian intermediate hosts and definitive feline hosts.  
54 Intermediate hosts are infected for life and support haploid division/asexual expansion  
55 of parasite strains. Intermediate hosts are infected when they ingest oocysts shed cat in  
56 feces or tissue cysts, termed bradyzoites, from muscle or brain of other intermediate  
57 hosts. Over the first three days post-ingestion, *Toxoplasma* migrates down the small  
58 intestine, converting to the rapidly dividing tachyzoites stage, infecting intestinal  
59 epithelial cells and immune cells(5–7). Acute infection is marked by severe, focal  
60 disruption of the villi, expansion of secondary lymphoid structures and the appearance  
61 of “casts” formed from matrix and dead cells that form a physical barrier over damaged

62 regions of the ileum(7). Several groups have reported a decrease in microbial diversity  
63 in the gut, an outgrowth of Gram negative bacterial species, as well as commensal  
64 microbe translocation to the liver(7–9). However, whether these alterations to  
65 commensal homeostasis are maintained during chronic infection has not been asked.

66 *Toxoplasma* benefits from local intestinal inflammation by infecting infiltrating  
67 monocytes and dendritic cells and using them to traffic throughout the host(10). Over  
68 the course of three to four weeks, a Th1-mediated adaptive immune response clears  
69 systemic parasitemia, except in immune-privileged tissues (mainly the brain and  
70 skeletal muscle) which support stage conversion to bradyzoite tissue cysts. Bradyzoites  
71 are characterized by altered transcriptional profiles, a shift to glycolytic metabolism,  
72 slow growth and formation of a polysaccharide-rich wall that protects the parasites as  
73 they transit through the stomach of the subsequent host(11). Thus, parasite  
74 transmission requires a robust host immune response; ensuring that the host survives  
75 acute infection and enabling the parasite to access the tissues amenable for chronic  
76 infection. Yet, once the parasite has converted to the bradyzoite, transmission requires  
77 predation of the chronically infected host. Cats acquire *Toxoplasma* by eating  
78 intermediate hosts and play an important role in the parasite life cycle by: 1) facilitating  
79 sexual recombination of the parasite thereby increasing genetic diversity; and 2)  
80 mediating range expansion of the parasite by shedding millions of highly stable and  
81 highly infectious oocysts(12,13). The selective advantage conferred by infecting cats  
82 and the predator-prey relationship between cats and rodents suggest that mice and rats  
83 are critical intermediate hosts for *Toxoplasma*. The importance of this relationship is  
84 evident in the sophisticated mechanisms the parasite has evolved to intersect host

85 signaling pathways(14), promoting intracellular survival; as well as the observation that  
86 *Toxoplasma* infected rodents lose their aversion to cat urine, a putative means to  
87 facilitate transmission(15,16).

88         Here we show that in the first 10 days post-*Toxoplasma* infection adult mice lose  
89 20% of their body mass, associated with elevated circulating cytokines, anorexia and  
90 moribund behavior. The majority of *Toxoplasma* infected animals do not succumb to  
91 infection yet the reduction of muscle mass and visceral white adipose depots is  
92 sustained. We show that *Toxoplasma* infects and replicates in distinct puncta in the  
93 distal jejunum and proximal ileum throughout the acute phase of infection. Peak  
94 inflammation correlates directly with parasite load but is resolved by 5 weeks post-  
95 infection. Using 16S sequencing, we identify an outgrowth of *Clostridia spp.* that is  
96 sustained during the chronic stages of disease. Importantly, co-housed uninfected  
97 animals exhibit a similar shift in commensal populations without exhibiting any signs of  
98 illness or weight loss, consistent with the conclusion that commensal alterations alone is  
99 not sufficient to explain the sustained cachexia disease. We propose that promoting  
100 muscle and fat wasting may be a means of enhancing the opportunity for rodent  
101 predation and transmission of this parasite to definitive feline hosts.

## 102 **Materials and Methods**

### 103 **Animals**

104         CBA/J, BALB/cJ, C57BL/6J and 1291/SvImJ mice were purchased from Jackson  
105 Laboratories. Animals were housed in BSLII level conditions. All animal protocols were  
106 approved by Stanford University's Administrative Panel on Laboratory Animal Care

107 (Animal Welfare Assurance # A3213-01, protocol # 9478) or The University of Virginia  
108 Institutional Animal Care and Use Committee (protocol # 4107-12-15) All animals were  
109 housed and treated in accordance with AAALAC and IACUC guidelines at the Stanford  
110 School of Medicine or the University of Virginia Veterinary Service Center.

## 111 Parasites, cells and cell lines

112 The parasite strain used for these studies was Me49 that stably expresses green  
113 fluorescent protein and luciferase, and has been previously described (17). Parasites  
114 were passaged intracellularly in human foreskin fibroblasts (ATCC) and passaged by  
115 25G syringe lysis in complete DMEM (cDMEM, Gibco) plus 10% FBS (HiClone), 100ug  
116 Penicillin-Streptomycin (Gibco) and 1mM Sodium Pyruvate (Gibco).

## 117 Infections

118 To generate cysts, 6-8 week-old female CBA/J mice were infected with 1000  
119 Me49 tachyzoites stably expressing green fluorescent protein and luciferase (Me49-gfp-  
120 luc) by intraperitoneal injection. 4-8 weeks following infection, mice were euthanized  
121 with CO<sub>2</sub> and brains were harvested, homogenized through a 50 µm filter, washed 3  
122 times in PBS, stained with dolichos biflorus agglutinin-rhodamine (Vector labs) and the  
123 number of cysts were determined by counting rhodamine GFP double-positive cysts at  
124 20x magnification. Prior to infection, 8-10 week male mice were cross-housed on dirty  
125 bedding for two weeks to normalize commensal microbiota. Mice were fasted overnight  
126 and fed between 100 and 250 Me49-GFP-luc cysts on ¼ piece of mouse chow. Weights  
127 and health were monitored daily. To measure food intake, mice were housed on chip  
128 bedding and food was weighed daily and normalized to total mouse body weight in the  
129 cage.

## 130 Tissue harvesting and cytokine measures:

131 At the experimental end points, mice were euthanized with CO<sub>2</sub>. Blood was  
132 isolated by cardiac stick, abdominal sub cutaneous white adipose depots, epididimal  
133 visceral white adipose depots, neck brown adipose depots, quadriceps, tibialis anterior,  
134 EDL and gastrocnemius muscles were isolate and placed in pre-weighed 2mL tubes for  
135 weighing. For small intestine, a Peyer's Patch containing regions of the distal jejunum  
136 or ileum were identified by eye. A 2cm section surrounding the Peyer's patch (or  
137 patches) was excised. Sections immediately adjacent to but excluding a Peyer's patch  
138 were harvested as well. Sera cytokines levels were measured by Luminex cytokine  
139 array at the Stanford Human Immune Monitoring Core or at the University of Virginia  
140 Flow Cytometry Core.

## 141 Bioluminescence imaging and quantification:

142 For bioluminescence imaging (BLI), mice were injected in the intraperitoneal  
143 cavity with with 200  $\mu$ L of a 15 mg/mL stock solution of luciferin (Xenogen),  
144 anesthetized with isoflurane and imaged for 4 minutes on an IVIS system. To image  
145 organs, mice were injected 5 minutes prior to euthanasia, organs were harvested and  
146 imaged for 4 minutes. Images were analyzed with LivingImage software and ImageJ.

## 147 Histology and microscopy

148 At the experimental end points, mice were euthanized with CO<sub>2</sub>, tissues were  
149 harvested and subjected to IVIS imaging and fixation in formalin. Samples were  
150 submitted to the Stanford Department of Comparative Medicine Histology Core for  
151 paraffin embedding and sectioning. For regions of the jejunum were selected based on

152 the presence of a Peyer's patch. Adjacent sections were taken and every other section  
153 was stained with H&E. A semi quantitative scoring system of 1 to 5, (1 = no significant  
154 lesion, 2 = mild, 3 = moderate, 4 = marked, 5 = severe) was used to evaluate the  
155 severity of any lesions. Parameters included inflammatory cellular infiltrate, loss of  
156 Peyer's patch organization, villi destruction and villi shortening. For detailed scoring,  
157 each tissue section was divided into fields of view at 40x and an inflammation score was  
158 assigned to each field of view.

159 Unstained sections were used to quantify *Toxoplasma* load. To deparaffinize,  
160 sections were passed twice through xylene, then through 100% ethanol, 80% ethanol  
161 and 50% ethanol and distilled water for 3 minutes each. Antigen retrieval was performed  
162 by incubating sections in sodium citrate buffer brought to a boil in the microwave and  
163 incubated for 15 minutes in a vegetable steamer (10mM Citric Acid, 0.05% Tween-20,  
164 pH6.0). Slides were cooled, washed once in PBS and outlined with a Pap pen to  
165 perform staining. Samples were blocked for 30 minutes in 5% goat sera in PBS.  
166 *Toxoplasma* was labeled with mouse anti-*Toxoplasma*-FITC (Thermo Scientific Clone  
167 J26A) at a concentration of 1  $\mu\text{g}/\mu\text{L}$  in 5% goat sera overnight. Samples were washed  
168 3x in PBS, mounted in Vectashield with DAPI (Vector Laboratories) and imaged on an  
169 Olympus BX60 upright fluorescence microscope with a 4x, 10x, 40x or 100x objective.  
170 To quantify parasite load, each section was subdivided identically to the adjacent H&E  
171 section. The threshold of parasite signal at 488nm was determined by comparison to  
172 uninfected samples, each image was converted to binary and the dark pixels were  
173 counted using ImageJ.



## 174 16S ribosomal sequencing and diversity analysis

175 Fresh fecal pellets were collected from mice at the time points indicated and flash  
176 frozen. DNA was isolated using the MoBio PowerSoil Kit and bar coded primers were  
177 used to amplify the V4 region of the 16S rRNA gene. MoBio UltraClean-htp 96 Well  
178 PCR Clean-Up Kit was used to purify PCR products which were then quantified using  
179 IQant-iT ds DAN Assay Kit. 184 samples were pooled at equimolar ratios. 16S  
180 ribosomal sequencing was performed by the Mayo Clinic using a single lane of the  
181 Illumina HiSeq. Community composition and beta diversity were determined using  
182 QIIME and beta diversity was visualized using EMPERor(17,18). T-tests were performed  
183 using GraphPad Prism and corrected for multiple hypothesis using the FDR approach.

184

## 185 Results and discussion

186 10-12 week male C57BL6 mice acquired from Jackson Labs were cross-housed  
187 for two weeks then infected per orally with 100-250 *Toxoplasma* cysts of the Me49  
188 background engineered to express GFP and luciferase (Me49-GFP-luc). Body weight  
189 was monitored for the duration of infection. Mice lost a significant amount of weight  
190 during the acute phase of infection, 7 to 14 days post infection (dpi), but weight loss  
191 stabilized by 30 dpi, the onset of chronic infection (Fig 1A). Although mice increased in  
192 weight over the chronic phase of infection (day 30-90) they remained 20% less massive  
193 than uninfected controls. Animals infected with 100 or 250 cysts had similar weight loss  
194 (Fig 1B) and survival through 40 dpi (Fig 1C). As expected, parasites were visible by  
195 bioluminescence assay when imaged ventrally at day 7 dpi (Fig 1D); however, by day

196 40 dpi, parasite signal was not detectable (Fig 1E). Of note, this phenotype was not  
197 restricted to C57BL/6 mice. CBA/J mice, also lost approximately 20% of their body  
198 mass; however, BALB/C mice which have a protective H-2L<sup>d</sup> haplotype do not exhibit  
199 weight loss in response to *Toxoplasma* infection (Fig F)(19,20). Although mice  
200 underwent a phase of anorexia during acute infection, they regained their appetites and  
201 consumed normal pre-infection food amounts by 15dpi indicating that sustained weight  
202 loss was not simply due to anorexia (Fig 1G). These results are consistent with a 1997  
203 report from Arsenijevic et al. that showed that mice infected with *Toxoplasma* can be  
204 described in different response groups: death in acute infection, failure to regain body  
205 mass or partial recovery of body mass(21). However, the physiological basis for this  
206 weightloss was not determined. To identify the tissue types effected, abdominal  
207 subcutaneous fat depots (scWAT, a rapidly mobilized energy source), epididimal  
208 visceral white adipose depots (vWAT, a key metabolic regulatory tissue), and  
209 supraclavicular brown adipose depot (BAT, thermogenic fat) were harvested. At 10 dpi,  
210 there was already significant reduction in BAT and scWAT depots. VWAT depots were  
211 significantly reduced 5 weeks post infection (wpi) (Fig 1H). In contrast to fat depots,  
212 which were reduced early, tibialis anterior (TA), gastrocnemius (GA) and quadriceps  
213 (QUAD) muscles were significantly reduced at 5wpi (Fig 1I). This sustained muscle loss  
214 was consistent with the recent observation of T reg mediated myositis during chronic  
215 *Toxoplasma* infection which leads to impaired animal strength(22). At 7 dpi, the  
216 canonical cachexia cytokines IL-1 $\beta$ , TNF- $\alpha$  and IL-6 were significantly upregulated in  
217 the sera (Fig 1J). Some inflammatory cytokines were still detected 5wpi, although the  
218 overall magnitude of inflammation was greatly reduced. Cumulatively these data

219 indicate that chronic infection with *Toxoplasma* meet a modern definition of cachexia put  
220 forth in 2008: the loss of 5% or more lean body mass accompanied by anorexia, fat  
221 loss, inflammation (IL-1, TNF, IL-6, acute phase proteins) and/or insulin resistance(2).

222 *Toxoplasma* is naturally acquired by ingestion of oocysts or tissue cysts leading  
223 to severe regional inflammation in the small intestine, a breakdown in small intestinal  
224 architecture and interaction with commensal microbiota that drive a TLR-mediated  
225 innate immune response (7,9,23). We reasoned that cachexia could be the result of  
226 sustained inflammation, changes in intestinal architecture and/or the gut commensal  
227 community. To address this question, we orally infected mice with 200 Me49-GFP-luc  
228 cysts. Three mice per day were euthanized to assess parasite load in the small  
229 intestine, mesenteric lymph node and spleen by bioluminescence assay. Significant  
230 parasite signal was observed in the small intestine at 4 dpi and peaked 7-8 dpi (Fig 2A,  
231 black bars), preceded by parasite dissemination to the mesenteric lymph nodes (Fig 2A,  
232 green bars) and spleen (Fig 2A, grey bars). For as long as *Toxoplasma* was detected by  
233 BLI (Fig 2A, 4-10dpi) the first luciferase signal was consistently found at 50% the length  
234 of the small intestine and the mean of all luciferase positive regions was identified at  
235  $2/3^{\text{rd}}$  the length of the intestine (Fig 2B). Gregg and colleagues have shown parasite  
236 infection along the mucosa of the small intestine in the duodenum, jejunum and ileum in  
237 the first 6 days of infection(6). Further, Molloy et al. demonstrated that 9 dpi,  
238 commensals were segregated from the epithelial layer in the ileum but not the jejunum  
239 by the presence of a 'cast'-like pseudomembrane composed of dead host cells and  
240 invasive *E. coli* suggesting that there is a distinct interplay between *Toxoplasma*,  
241 commensals and the immune system in this tissue(7). While we did not observe

242 parasite signal in the duodenum, this may be due the fact that we imaged intestines  
243 from the serosal side rather than the luminal aspect. In addition bioluminescence assay  
244 is not sensitive enough to detect small numbers of parasites that may be present  
245 elsewhere in the small intestine(6). None the less, our data are consistent with the  
246 interpretation that the distal jejunum/proximal ileum is the major small intestinal niche for  
247 parasite replication throughout acute infection. This region of the small intestine is  
248 enriched in immune resident cells, specialized structures, like M cells that allow for  
249 sampling of the lumen and pathogen transit as well as an expansion in microbial  
250 diversity any of which could contribute to *Toxoplasma*'s predilection for residence in this  
251 niche(24).

252 Diet as well as reactive oxygen species derived from inflammatory infiltrate can  
253 produce auto-luminescent signal. To validate that the luciferase signal was derived from  
254 *Toxoplasma*, and to monitor the degree of inflammation, we harvested segments of the  
255 small intestine 7 dpi for histological analysis. Having observed that luciferase positive  
256 regions always occurred adjacent to at least one enlarged Peyer's patch, 2cm segments  
257 centered on a Peyer's patch (or Peyer's patches) were excised from the small intestine  
258 of infected and uninfected mice (Fig 2C-G). This allowed us to assess parasite load and  
259 degree of inflammation in matched regions of the intestine across time points without  
260 pre-existing knowledge about parasite location provided by BLI. These Intestine  
261 segments were fixed and sectioned. One section was stained with H&E (Fig 2C, D, G)  
262 to assess inflammation. The adjacent section was de-paraffinized and stained for  
263 *Toxoplasma* using an antibody specific to parasite lysate and for nuclei using DAPI (Fig  
264 2i-iv). At 7 dpi, tachyzoites were observed throughout the villi and the lamina propria.

265 Interestingly, in sections where a Peyer's patch was cross-sectioned, parasites were  
266 observed nearby but excluded from lymphoid follicle (Fig 2Ci and ii). When H&E  
267 sections were examined at high magnification, vacuoles containing multiple tachyzoites  
268 were visible in intestinal epithelial cells, indicating that parasites were growing in this  
269 niche at 7dpi (Fig 2Div, 100x, asterisks).

270 We noticed the fields of view closest to the Peyer's patch contained the most  
271 *Toxoplasma* (Fig 2D iv), whereas neighboring fields of view contained few parasites  
272 and were less morphologically disrupted (Fig 2D iii and v). To quantify this observation,  
273 2cm segments of the intestine containing a Peyer's patch or 2cm segments immediately  
274 adjacent to but excluding Peyer's patches were isolated, sectioned, and stained for H&E  
275 or *Toxoplasma* as described above. Across each section, there was a significant  
276 positive correlation between inflammation score and parasite load (Fig 2E Pearson's  
277 correlation, Peyer's patch segments, red:  $r=0.716$ ,  $n=98$ ,  $p<0.0001$ ; adjacent segments,  
278 grey:  $r=0.602$ ,  $n=81$ ,  $p<0.0001$ ). Peyer's patch negative sections had a significantly  
279 lower overall inflammation score and parasite load (Fig 2E linear regression of  
280 correlations, Peyer's patch segments:  $0.781\pm 0.078$ ; Adjacent segments:  $0.296\pm 0.044$ ,  
281  $p<0.0001$  and Fig 2F). By 5 wpi there was no significant difference between parasite  
282 load or inflammation score in infected versus uninfected intestinal segments (Fig 2F).  
283 Also consistent with the conclusion that infection in the small intestine was resolved in  
284 chronic disease, Peyer's patch architecture, which had a highly disorganized germinal  
285 center 7 dpi, was indistinguishable from uninfected animals by H&E staining 5wpi (Fig  
286 2G). Taken together, these results indicate that acute inflammation in the small intestine

287 is resolved by chronic infection and is therefore unlikely to drive the sustained cachexia  
288 in these animals.

289         Several groups have observed that acute infection with *Toxoplasma* triggers a  
290 loss of microbial diversity, an enrichment in Gram negative bacteria associated with  
291 intestinal pathology, and, sometimes, lethal ileitis(7,9,25). However, it is not known if  
292 these changes in the commensal communities are transient or sustained in chronic  
293 infection. To address this, we collected fecal pellets from mice over the course of  
294 infection with *Toxoplasma* and analyzed microbial diversity by 16S ribosomal  
295 sequencing (Fig 3). In each cage, 1-2 uninfected animals were co-housed with infected  
296 littermate controls. Community composition analysis reflected significant expansion in  
297 *Clostridia spp.* OTUs 5 weeks post-*Toxoplasma* infection when compared to the pre-  
298 infection community (Fig 3A navy blue outset, 5 wpi  $0.599\pm 0.142$  versus pre-infection  
299  $0.147\pm 0.015$  SEM,  $p=0.0004$ ,  $q=0.007$  student's T-test). This trend was also observed  
300 in uninfected animals, although it was not statistically significant (5wpi  $0.373\pm 0.181$   
301 versus pre-infection  $0.100\pm 0.005$  SEM,  $p=0.319$ ,  $q=0.569$ ). There was also a moderate,  
302 expansion in Verrucomicrobia at 1 week in both infected and uninfected animals that  
303 contracted by 5 weeks, although this change was not significant. The enrichment of  
304 *Clostridia spp.* in fecal pellets of infected mice was unexpected, based on previous  
305 observations that *Toxoplasma* infection can trigger an outgrowth of  $\gamma$ -proteobacteria in  
306 the lumen of the small intestine 7-9 dpi (7,8,25,26). When interpreted in the context of  
307 previous reports, these results are consistent with a model where the outgrowth species  
308 may reflect the facultative pathogens already present in the community (dependent on  
309 mouse genetic background and facility to facility variation) that capitalize on niche

310 availability following an inflammatory insult, rather than a specific relationship between a  
311 specific facultative species and *Toxoplasma*. Interestingly, enrichment in *Clostridia spp.*  
312 has been associated with expanded populations of regulatory T cells in the intestine,  
313 which may explain why our mice are more resistant to a high dose infection with Me49  
314 cysts than others have reported in the past (9,21,24). A second parameter that may  
315 explain why our mice are tolerant of high dose infection is that uninfected and infected  
316 animals were co-housed for the duration of the study. Coprophagia may have buffered  
317 the severity of the commensal shift in infected mice as well as altered the commensal  
318 population in uninfected animals, as discussed below.

319         When principal component analysis was used to assess beta diversity across  
320 fecal pellets, pre-infection animals (Fig 3B red) clustered distinctly from infected animals  
321 (Fig 3B small circles: yellow=1 wpi, green=2 wpi; magenta=5 wpi). Interestingly, the co-  
322 housed uninfected animals had a shift in microbial diversity as well and represented an  
323 intermediate cluster between pre-infection and infected animals (Fig 3B, 1 wpi yellow,  
324 large circles; 2 wpi green, large circles). The shift in similarity away from pre-infected  
325 phenotype was most pronounced by 5 wpi. (Fig 3B magenta, small circles=infected,  
326 large circles=uninfected). As co-housed, uninfected animals do not display symptoms of  
327 cachexia we conclude that the observed changes to the microbial species are not  
328 sufficient to explain the cachexia phenotype alone. However, future studies will be  
329 needed to understand if the altered commensal community synergizes with immune or  
330 metabolic defects to promote cachexia maintenance.

## 331 Conclusions

332 Here we describe a sustained cachexia phenotype in adult C57BL/6 mice (age  
333 10-12 weeks) following per oral *Toxoplasma* infection. *Toxoplasma* cachexia is  
334 characterized by a loss of 20% in body mass, including fat and muscle, transient  
335 anorexia and an elevation in the hallmark cachexia cytokines IL-1, TNF and IL-6. To our  
336 knowledge, *Toxoplasma* infection is the first model to study sustained cachexia in mice  
337 that meets the modern, standard definition of cachexia put forth in 2008 (2).  
338 *Toxoplasma* infection is well established to result in acute regional ileitis, however, a  
339 detailed analysis of how long intestinal inflammation is sustained or whether acute  
340 changes in commensal microbial communities are long lived has not been asked until  
341 now. We determined that the major region of the small intestine supporting parasite  
342 replication throughout acute infection is the distal jejunum. Although we observed no  
343 evidence of sustained intestinal inflammation in chronic infection, the changes in fecal  
344 commensal communities observed in acute infection became more polarized in chronic  
345 infection. Importantly, the commensal communities of co-housed infected and  
346 uninfected mice both shifted by 5 weeks post inoculation. However, uninfected animals  
347 showed no signs of disease, suggesting that altered commensal microbiota alone is not  
348 sufficient to explain the sustained cachexia phenotype in infected animals.

349 Whether the cachexia program is beneficial to the host or the parasite remains to  
350 be determined. Anorexia and depletion of fat stores are classic signatures of infection  
351 that play an important role in restricting systemic bacterial pathogen replication but can  
352 trigger a host-detrimental response during viral infection(27,28). In tissue culture, the  
353 *Toxoplasma* vacuole accumulates host lipids and parasite growth can be inhibited by



354 blocking host lipases, suggesting that the lipolysis mobilized early in infection could  
355 benefit the parasite although this has not been tested in vivo(29,30). It is now well  
356 accepted that *Toxoplasma* infection triggers altered aversion behavior to feline  
357 urine(15,16). This is hypothesized to be an adaptive strategy used by the parasite to  
358 facilitate transmission to the feline definitive host. Interestingly, the reduction in muscle  
359 mass during chronic *Toxoplasma* infection has been associated with reduced  
360 strength(22). Therefore, it is plausible that promoting cachexia during chronic infection  
361 represents a second adaptive strategy used by *Toxoplasma* to facilitate the likelihood of  
362 predation by the definitive feline host. By studying the pathways that *Toxoplasma* has  
363 evolved to manipulate to promote transmission, we may identify critical immune and  
364 metabolic interactions driving the progression of chronic cachexia that can be applied to  
365 other disease settings.

## 366 Acknowledgements

367 We would like to thank Peter Buckmaster and the Stanford Veterinary Student Summer  
368 Fellowship Program for student support and constructive criticism on this project. We would  
369 like thank Erica Sonnenburg for advice and reagents for 16S sequencing.

## 370 References

- 371 1. Products - National Vital Statistics Reports - Homepage.
- 372 2. Evans WJ, Morley JE, Argilés J, Bales C, Baracos V, Guttridge D, et al. Cachexia:  
373 A new definition. *Clin Nutr.* 2008;27(6):793–9.
- 374 3. Tisdale MJ. Biology of Cachexia. *JNCI J Natl Cancer Inst [Internet].*  
375 1997;89(23):1763–73. Available from:  
376 <http://jnci.oxfordjournals.org/content/89/23/1763.full>
- 377 4. Deboer MD. Animal models of anorexia and cachexia. *Expert Opin Drug Discov.*  
378 *NIH Public Access;* 2009 Nov;4(11):1145–55.
- 379 5. Coombes JL, Charsar BA, Han S-J, Halkias J, Chan SW, Koshy AA, et al. Motile  
380 invaded neutrophils in the small intestine of *Toxoplasma gondii*-infected mice  
381 reveal a potential mechanism for parasite spread. *Proc Natl Acad Sci U S A.*  
382 *National Academy of Sciences;* 2013 May;110(21):E1913-22.
- 383 6. Gregg B, Taylor BC, John B, Tait-Wojno ED, Girgis NM, Miller N, et al.  
384 Replication and distribution of *toxoplasma gondii* in the small intestine after oral  
385 infection with tissue cysts. *Infect Immun.* 2013;81(5):1635–43.
- 386 7. Molloy MJ, Grainger JR, Bouladoux N, Hand TW, Koo LY, Naik S, et al.  
387 Intraluminal Containment of Commensal Outgrowth in the Gut during Infection-  
388 Induced Dysbiosis. *Cell Host Microbe.* 2013 Sep;14(3):318–28.
- 389 8. von Klitzing E, Ekmekciü I, Köhl AA, Bereswill S, Heimesaat MM, Wal J.  
390 Intestinal, extra-intestinal and systemic sequelae of *Toxoplasma gondii* induced  
391 acute ileitis in mice harboring a human gut microbiota. Grigg ME, editor. *PLoS*  
392 *One.* Public Library of Science; 2017 Apr;12(4):e0176144.

- 393 9. Heimesaat MM, Bereswill S, Fischer A, Fuchs D, Struck D, Niebergall J, et al.  
394 Gram-Negative Bacteria Aggravate Murine Small Intestinal Th1-Type  
395 Immunopathology following Oral Infection with *Toxoplasma gondii*. *J Immunol*.  
396 2006;177(12).
- 397 10. Bierly AL, Shufesky WJ, Sukhumavasi W, Morelli AE, Denkers EY. Dendritic cells  
398 expressing plasmacytoid marker PDCA-1 are Trojan horses during *Toxoplasma*  
399 *gondii* infection. *J Immunol*. 2008 Dec;181(12):8485–91.
- 400 11. Kim K, Weiss LM. *Toxoplasma gondii*: the model apicomplexan. *Int J Parasitol*.  
401 2004 Mar;34(3):423–32.
- 402 12. Dubey JP. History of the discovery of the life cycle of *Toxoplasma gondii*. *Int J*  
403 *Parasitol*. 2009;39(8):877–82.
- 404 13. Boothroyd JC. Expansion of host range as a driving force in the evolution of  
405 *Toxoplasma*. *Mem Inst Oswaldo Cruz. Fundação Oswaldo Cruz*; 2009  
406 Mar;104(2):179–84.
- 407 14. Blader IJ, Saeij JP. Communication between *Toxoplasma gondii* and its host:  
408 impact on parasite growth, development, immune evasion, and virulence. *APMIS*.  
409 NIH Public Access; 2009 May;117(5–6):458–76.
- 410 15. Vyas A, Kim S-K, Giacomini N, Boothroyd JC, Sapolsky RM. Behavioral changes  
411 induced by *Toxoplasma* infection of rodents are highly specific to aversion of cat  
412 odors. *Proc Natl Acad Sci [Internet]*. 2007;104(15):6442–7. Available from:  
413 <http://www.pnas.org/cgi/doi/10.1073/pnas.0608310104>
- 414 16. Berdoy M, Webster JP, Macdonald DW. Fatal attraction in rats infected with  
415 *Toxoplasma gondii*. *Proc R Soc B Biol Sci*. 2000 Aug;267(1452):1591–4.

- 416 17. Caporaso JG, Kuczynski J, Stombaugh J, Bittinger K, Bushman FD, Costello EK,  
417 et al. QIIME allows analysis of high-throughput community sequencing data. *Nat*  
418 *Methods*. Nature Publishing Group; 2010 May;7(5):335–6.
- 419 18. Vázquez-Baeza Y, Pirrung M, Gonzalez A, Knight R. EMPeror: a tool for  
420 visualizing high-throughput microbial community data. *Gigascience*. 2013;2(1):16.
- 421 19. Blanchard N, Gonzalez F, Schaeffer M, Joncker NT, Cheng T, Shastri AJ, et al.  
422 Immunodominant, protective response to the parasite *Toxoplasma gondii* requires  
423 antigen processing in the endoplasmic reticulum. *Nat Immunol*. 2008  
424 Aug;9(8):937–44.
- 425 20. Grover HS, Chu HH, Kelly FD, Yang SJ, Reese ML, Blanchard N, et al. Impact of  
426 Regulated Secretion on Antiparasitic CD8 T Cell Responses. *Cell Rep*. 2014  
427 Jun;7(5):1716–28.
- 428 21. Arsenijevic D, Girardier L, Seydoux J, Chang HR, Dulloo AG. Altered energy  
429 balance and cytokine gene expression in a murine model of chronic infection with  
430 *Toxoplasma gondii*. *Am J Physiol [Internet]*. 1997;272(5 Pt 1):E908-17. Available  
431 from:  
432 [http://www.ncbi.nlm.nih.gov/entrez/query.fcgi?cmd=Retrieve&db=PubMed&dopt=](http://www.ncbi.nlm.nih.gov/entrez/query.fcgi?cmd=Retrieve&db=PubMed&dopt=Citation&list_uids=9176193)  
433 [Citation&list\\_uids=9176193](http://www.ncbi.nlm.nih.gov/entrez/query.fcgi?cmd=Retrieve&db=PubMed&dopt=Citation&list_uids=9176193)
- 434 22. Jin RM, Blair SJ, Warunek J, Reid R, Blader IJ, Wohlfert EA, et al. Regulatory T  
435 Cells Promote Myositis and Muscle Damage in *Toxoplasma gondii* Infection. *J*  
436 *Immunol*. 2017;198(1).
- 437 23. Benson A, Pifer R, Behrendt CL, Hooper L V, Yarovinsky F. Gut commensal  
438 bacteria direct a protective immune response against *Toxoplasma gondii*. *Cell*

- 439 Host Microbe. 2009 Aug;6(2):187–96.
- 440 24. Mowat AM, Agace WW. Regional specialization within the intestinal immune  
441 system. Nat Rev Immunol [Internet]. 2014;14(10):667–85. Available from:  
442 <http://www.nature.com/doi/10.1038/nri3738>
- 443 25. Heimesaat MM, Fischer A, Siegmund B, Kupz A, Niebergall J, Fuchs D, et al.  
444 Shift Towards Pro-inflammatory Intestinal Bacteria Aggravates Acute Murine  
445 Colitis via Toll-like Receptors 2 and 4. Aballay A, editor. PLoS One. Public Library  
446 of Science; 2007 Jul;2(7):e662.
- 447 26. Raetz M, Hwang S, Wilhelm CL, Kirkland D, Benson A, Sturge CR, et al. Parasite-  
448 induced TH1 cells and intestinal dysbiosis cooperate in IFN- $\gamma$ -dependent  
449 elimination of Paneth cells. Nat Immunol. 2012;
- 450 27. Wang A, Huen SC, Luan HH, Yu S, Zhang C, Gallezot JD, et al. Opposing Effects  
451 of Fasting Metabolism on Tissue Tolerance in Bacterial and Viral Inflammation.  
452 Cell [Internet]. Elsevier Inc.; 2016;166(6):1512–1525.e12. Available from:  
453 <http://dx.doi.org/10.1016/j.cell.2016.07.026>
- 454 28. Rao S, Schieber AMP, O'Connor CP, Leblanc M, Michel D, Ayres JS. Pathogen-  
455 Mediated Inhibition of Anorexia Promotes Host Survival and Transmission. Cell  
456 [Internet]. Elsevier; 2017;168(3):503–516.e12. Available from:  
457 <http://dx.doi.org/10.1016/j.cell.2017.01.006>
- 458 29. Nolan SJ, Romano JD, Coppens I. Host lipid droplets: An important source of  
459 lipids salvaged by the intracellular parasite *Toxoplasma gondii*. PLoS Pathog.  
460 2017;13(6).
- 461 30. Hu X, Binns D, Reese ML. The coccidian parasites *Toxoplasma* and *Neospora*

462 dysregulate mammalian lipid droplet biogenesis. 2017;(9).

## 463 Figure Legends

### 464 Fig 1. C57BL/6 mice infected with *Toxoplasma* become chronically cachexic.

465 (A) Following per oral infection with 120 Me49-GFP-luciferase cysts (grey) or mock  
466 infection (black) mice were monitored for weight loss. Data average of 8 experiments.  
467 (B) Mice were infected as described in A with 100 cysts (dashed line), 250 cysts (grey)  
468 or mock infected (black) weight was monitored at the indicated time points. (C) Survival  
469 curves for mice represented in B. N=4-7 mice per group, data representative at least 3  
470 experiments. (D) Mice were harvested at 7 days post infection (dpi) (E) or 40 dpi to  
471 assess parasite load by bioluminescence assay. (F) BALB/c (orange square) or  
472 C57BL6/J mice (black square, B6 BALB cont.); CBA/J (blue circles) or C57BL6/J (black  
473 circles, CBA cont.) were infected with 120-200 cysts or mock infected. Weight was  
474 monitored at indicated time points. N=4-8 mice per condition averaged across two  
475 independent experiments, significance is measured relative to uninfected at same time  
476 point. (G) Food was weighed every 24 hours to determine the amount eaten and  
477 normalized to the weight of animals in the cage. Data are average of 2 experiments,  
478 N=5 mice per group each experiment. Significance relative to uninfected at the same  
479 time point. H, Brown adipose tissue (BAT), sub cutaneous white adipose tissue  
480 (scWAT) or visceral white adipose tissue (vWAT) was harvest at 10 dpi (black) or 5 wpi  
481 (grey) and weighed. I, Extensor digitorum longus (EDL), tibialis anterior (TA),  
482 gastrocnemius (GA) and quadriceps (QUAD) muscles were weighed at 10 dpi (black) or  
483 5 wpi (grey) post infection. Data is average of 2 experiments, N=5-10 mice per time  
484 point. J, Luminex cytokine array was performed on sera from uninfected mice (black), 7

485 dpi (grey) or 5 wpi (red) mice. N=3-10 mice per group. \*  $p \leq 0.01$ , \*\*  $p \leq 0.001$ , \*\*\* $p \leq 0.001$ ,  
486 SEM, student's T-test.

487

488 **Fig 2. Mice recover from severe acute inflammation and parasite growth in the**  
489 **small intestine.** (A-B) Following per oral infection with 200 Me49-GFP-luc cysts, mice  
490 were euthanized and parasite load was determined by BLI in the small intestine (black),  
491 mesenteric lymph nodes (MLN, green) and spleen (grey). N=3 animals per day,  
492 Significance is measured for each time point relative to day 3 post infection. Student's  
493 T-test \*  $p \leq 0.01$ , \*\*  $p \leq 0.001$ . (B) For each intestine, the position of the luciferase signal  
494 was measured as distance from the stomach to the first luciferase positive region (1<sup>st</sup>  
495 luc+) or mean of all luciferase positive regions (mean luc +). Position was averaged  
496 across 4 to 10 dpi. (C-H) 2cm segments of the distal jejunum/ileum (the distal 50-90% of  
497 the small intestine) were excised for histology based on the presence of Peyer's  
498 patches visible to the eye at 7dpi, 5wpi or from uninfected mice.(C, D) Representative  
499 images of 7dpi sections stained with H&E to assess inflammations score at 10x  
500 magnification (scale of 1=no detectable inflammation to 5=complete disruption of  
501 lymphoid structure and/or villi) or to identify parasite vacuoles at 100x magnification (iv,  
502 asterisks). An adjacent section of each intestinal segment was stained with a  
503 *Toxoplasma*-specific antibody (green) and DAPI (blue and imaged at 10x (i-iv) to assess  
504 parasite load. (E) Strength of the correlation between parasite load and inflammation  
505 score for 7dpi intestine segments containing a Peyer's patch (red) or adjacent segments  
506 lacking a Peyer's patch (grey), Pearson's correlation \*\*\*\*  $p \leq 0.0001$ . Slopes were  
507 significantly different between the two groups: Peyer's patch  $0.781 \pm 0.078$ , adjacent

508 0.296±0.044 p<0.0001, linear regression of correlations. (F) Inflammation score for  
509 Peyer's patch-containing segments (solid bars) and adjacent, Peyer's patch negative  
510 segments (dashed bars) of the intestine in uninfected animals, 7 dpi (black) or 5wpi  
511 (grey). Student's T-test \*p≤0.05, \*\* p≤0.001, SEM, N=4-6 segments from 3 mice per  
512 condition. (G) Representative images of Peyer's patch organization in uninfected 7dpi  
513 and 5wpi small intestines.

514

515 **Fig 3. Changes in the commensal community are amplified in chronic infection.**

516 16S profiling of fecal pellet commensal microbiota before pre-infection, 1wpi or 5wpi  
517 with 120 *Toxoplasma* cysts. (A) At chronic infection there is a significant outgrowth of  
518 *Firmicutes Clostridia* in comparison to pre-infection (navy blue, outset). *Toxoplasma*  
519 infected group: pre-infection mean 0.147±0.015 SEM, 5wpi mean 0.599±0.142 SEM,  
520 \*\*\*p≤0.001 student's T-test. Data are mean of 3-8 mice per time point. (B) Unweighted  
521 Unifrac principle component analysis of 16S ribosomal subunit diversity in the fecal  
522 pellets of mice pre-infection (red), 1 wpi (orange), 2 wpi (green) or 5 wpi (magenta).  
523 Small circles=infected, large circles = uninfected. Data representative of two  
524 experiments.



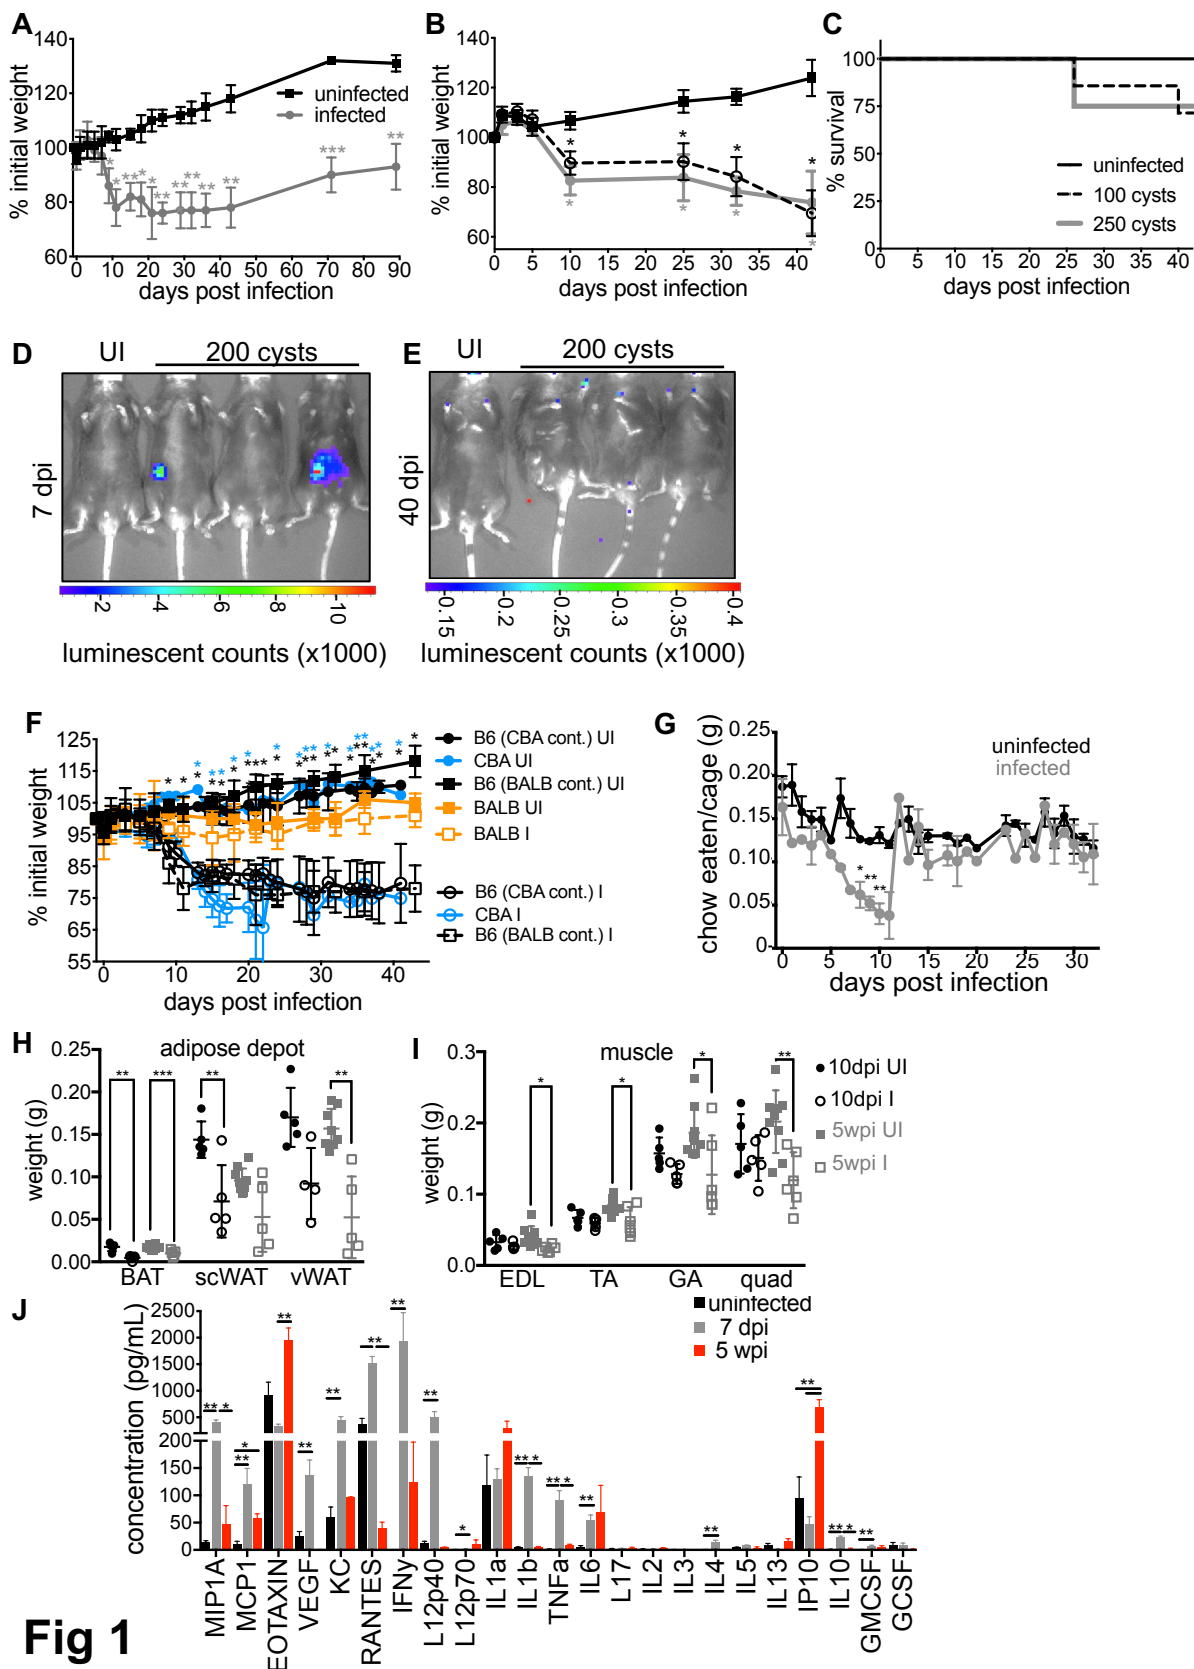

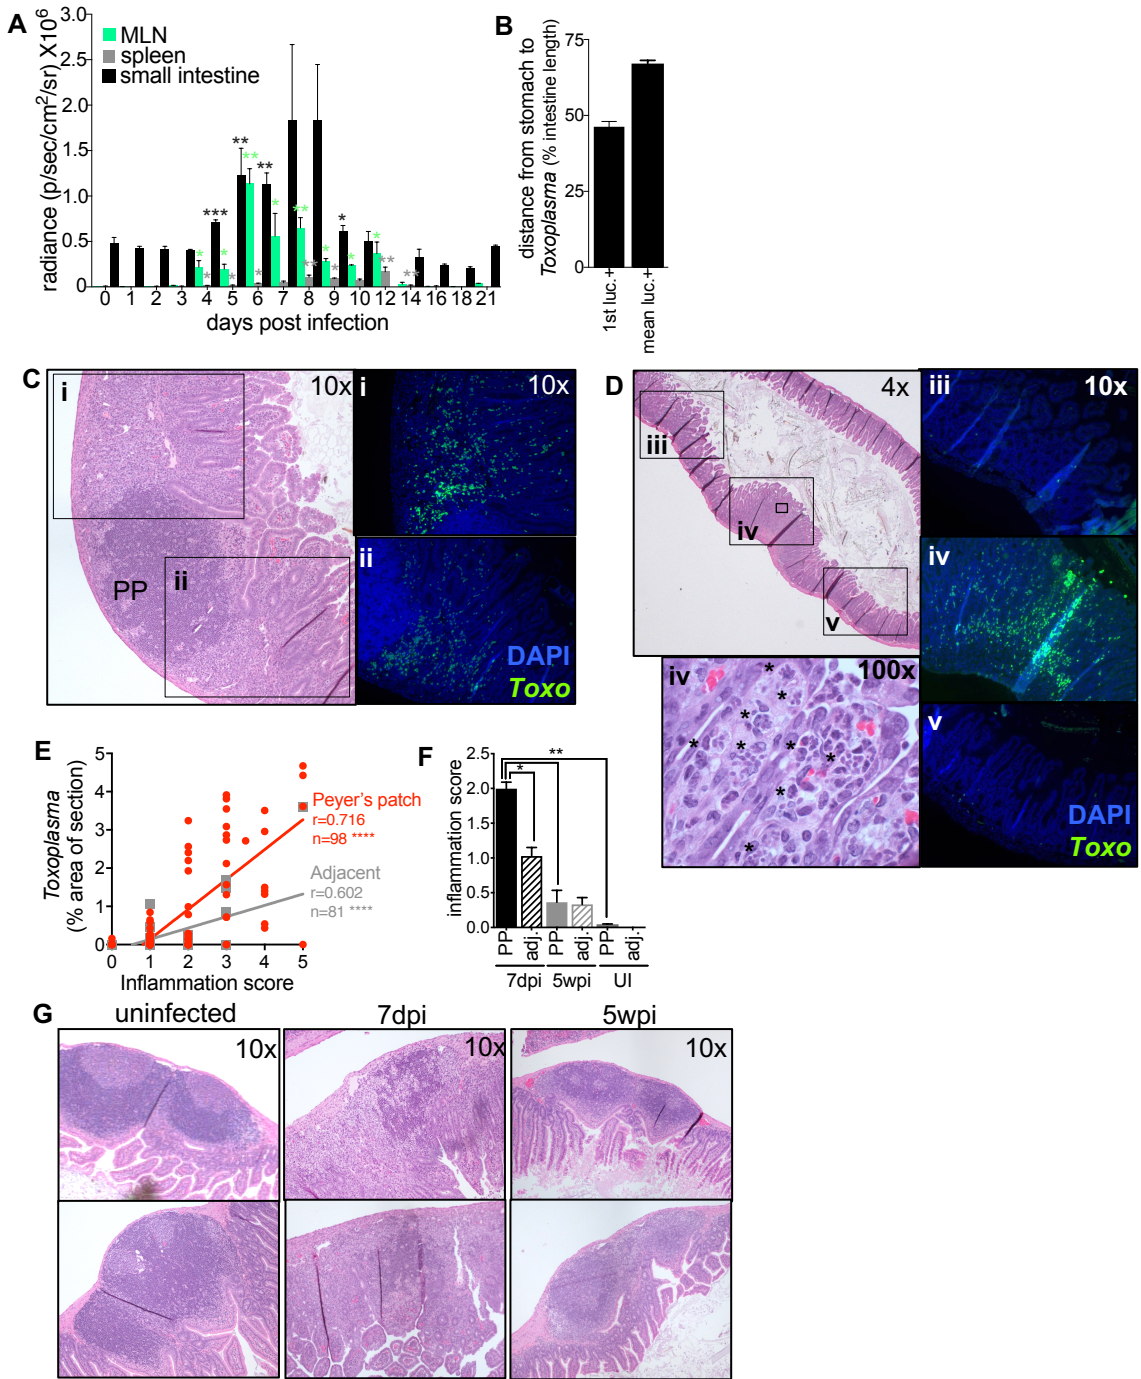

**Fig 2**

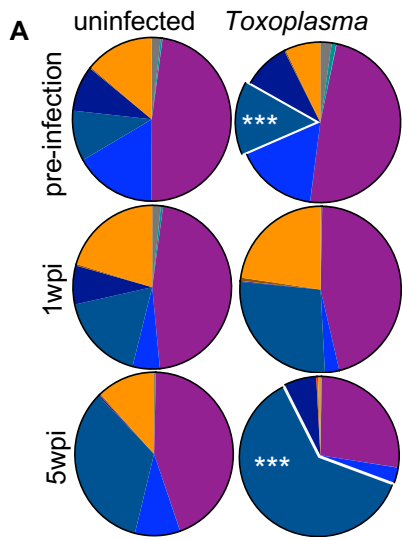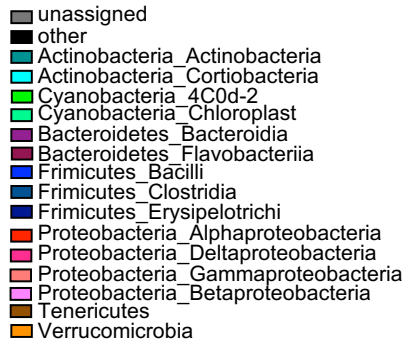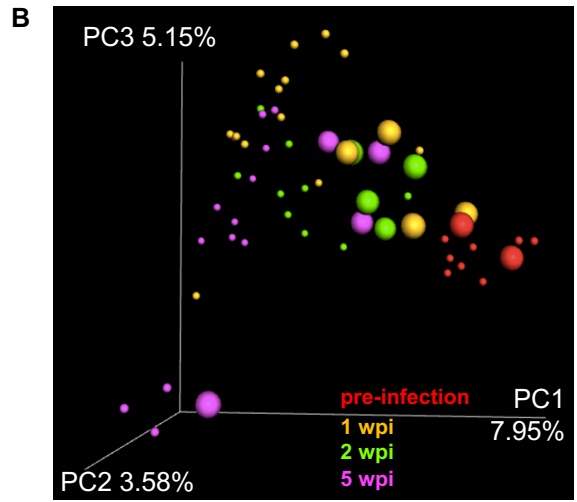

**Fig 3**
